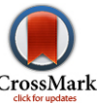

# PIWI Proteins Are Dispensable for Mouse Somatic Development and Reprogramming of Fibroblasts into Pluripotent Stem Cells

Ee-Chun Cheng<sup>1</sup>, Dongwan Kang<sup>2</sup>, Zhong Wang<sup>2</sup>, Haifan Lin<sup>1\*</sup>

<sup>1</sup> Yale Stem Cell Center and Department of Cell Biology, Yale University School of Medicine, New Haven, Connecticut, United States of America, <sup>2</sup> Genomics Division, Lawrence Berkeley National Laboratory, Berkeley, California, United States of America

## Abstract

PIWI proteins play essential and conserved roles in germline development, including germline stem cell maintenance and meiosis. Because germline regulators such as OCT4, NANOG, and SOX2 are known to be potent factors that reprogram differentiated somatic cells into induced pluripotent stem cells (iPSCs), we investigated whether the PIWI protein family is involved in iPSC production. We find that all three mouse *Piwi* genes, *Miwi*, *Mili*, and *Miwi2*, are expressed in embryonic stem cells (ESCs) at higher levels than in fibroblasts, with *Mili* being the highest. However, mice lacking all three *Piwi* genes are viable and female fertile, and are only male sterile. Furthermore, embryonic fibroblasts derived from *Miwi/Mili/Miwi2* triple knockout embryos can be efficiently reprogrammed into iPSC cells. These iPSC cells expressed pluripotency markers and were capable of differentiating into all three germ layers in teratoma assays. Genome-wide expression profiling reveals that the triple knockout iPSC cells are very similar to littermate control iPSC cells. These results indicate that PIWI proteins are dispensable for direct reprogramming of mouse fibroblasts.

**Citation:** Cheng E-C, Kang D, Wang Z, Lin H (2014) PIWI Proteins Are Dispensable for Mouse Somatic Development and Reprogramming of Fibroblasts into Pluripotent Stem Cells. PLoS ONE 9(9): e97821. doi:10.1371/journal.pone.0097821

**Editor:** Guang Hu, National Institute of Environmental Health Sciences, United States of America

**Received:** March 6, 2014; **Accepted:** April 23, 2014; **Published:** September 19, 2014

**Copyright:** © 2014 Cheng et al. This is an open-access article distributed under the terms of the Creative Commons Attribution License, which permits unrestricted use, distribution, and reproduction in any medium, provided the original author and source are credited.

**Funding:** This work was supported by the National Institutes of Health Grant R37HD42012 to H.L. D.K. and Z.W. were supported by the Office of Science of the U.S. Department of Energy under Contract No. DE-AC02-05CH11231. The funders had no role in study design, data collection and analysis, decision to publish, or preparation of the manuscript.

**Competing Interests:** The authors have declared that no competing interests exist.

\* Email: haifan.lin@yale.edu

## Introduction

The germ cell is the totipotent cell type capable of generating an entirely new organism. Its extraordinary potential begins from the time of primordial germ cell (PGC) formation, with stage-dependent transcriptional reactivation of the pluripotency-associated gene network, followed by stepwise activation of PGC-specific genes [1–3]. Recent studies have shown that germ cell factors contribute to naive pluripotency in ESCs partly through the repression of differentiation and/or the integration into the core transcriptional regulatory network [4–6]. Multiple germline factors that function in PGC and/or spermatogonia, such as OCT4, SOX2, LIN28, PRDM14, and NANOG, are potent mediators of somatic cell reprogramming [4,7–17]. In addition, *ex vivo* PGCs are able to give rise to pluripotent stem cells directly [18,19]. All these observations have led to a notion that reprogramming of somatic cells to a ground state of pluripotency might entail a transition through a PGC-like state [20,21], and that germ cell determinants may facilitate successful and efficient reprogramming of somatic cells into pluripotent stem cells.

We first discovered *Piwi* (*P*-element induced *wimpy* testis) to be a critical factor in *Drosophila* germline stem cell self-renewal [22,23]. In addition, the *Drosophila* *Piwi* protein is essential for the establishment of PGCs; depleting *piwi* leads to failure in PGC formation, while elevating *piwi* dose increases the number of PGCs [24–26]. Increasing evidence indicates that the PIWI protein family critically influences germline development from

germline determination and stem cell maintenance to spermatogenesis across animal phylogeny [27,28].

There are three PIWI proteins in mice, MIWI, MILI, and MIWI2, with individual mutants displaying unique defects during spermatogenesis. MIWI is expressed in male germ cells from the meiotic spermatocyte stage through the elongating spermatid stage and the mutant arrests at the round spermatid stage [29]. MILI is expressed from embryonic day 12.5 to the round spermatid stage [30]. Germline stem cells lacking MILI fail to self-renew or differentiate [30]. Occasionally, spermatogenic cells can escape the differentiation block but become arrested at the early pachytene stage of spermatogenesis [31]. MIWI2 is expressed in the embryonic and neonatal but not the adult testis. However, the terminal mutant phenotype of MIWI2 is observed much later during meiosis, with arrested leptotene spermatocytes and massive apoptosis of spermatogonia [32]. MIWI2 is a nuclear protein that may function epigenetically to set up a chromatin state in embryonic germ cells that is required for successful spermatogenesis in the adult [33].

Given the pivotal roles of PIWI family proteins in the germline, we investigated whether they can promote the generation and maintenance of iPSCs. Using mouse embryonic fibroblasts (MEFs) that are depleted for all murine PIWI family proteins, we showed that iPSC reprogramming can be achieved in the absence of all three PIWI proteins. The resulting cells exhibited pluripotent gene expression, were capable of differentiating into the three germ

layers in teratoma assays, and had transcriptomes similar to those induced from littermate control cells containing wild type alleles of all three *Piwi* genes.

## Results

### *Piwi* genes are expressed in embryonic stem cells

We first examined the gene expression patterns of *Miwi*, *Mili*, and *Miwi2* in mouse cells (Figure 1A), and *HIWI*, *HILI*, and *HIWI2* in human cells (Figure 1B). Quantitative RT-PCR analysis demonstrated that all of the *piwi* genes are expressed in ESCs with the exception of *HIWI*, which is almost undetectable. In contrast, the expression of all the genes in somatic cells is very low. The expression patterns of *piwi* family members are similar between mice and humans. Among the three *piwi* homologs, *piwil2* (*Mili* in mouse and *HILI* in human) transcripts were expressed at the highest level in ESCs. This indicates that *piwi* genes might be important for embryonic development.

### Mice lacking all mouse PIWI proteins are viable

To test the role of PIWI proteins in somatic development, we generated *Miwi*(-/-), *Mili*(-/-), and *Miwi2*(-/-) triple-knockout (TKO) mice (Materials and Methods) because individual *piwi* mutants are completely viable [29,31,32]. The *Miwi* mutant was generated by replacing almost the entire open reading frame (ORF) for MIWI with GFP, resulting in a fusion protein that contains only the first nine amino acid residues of MIWI fused to GFP via a PPRQ linker [29]. Thus, the *Miwi* mutant is a functionally null allele. In the *Miwi2* mutant, multiple in-frame stop codons were inserted, producing a protein-null allele [32]. The *Mili* mutant allele has exons 2 to 5 deleted, which corresponds to the first 209 amino acid residues of the MILI protein [31]. No MILI protein was detected by western blotting using an antibody against the conserved PAZ domain (386-494 amino acid residues), which is located downstream of the deletion [34]. This indicates that the *Mili* mutant used in this study is also protein-null. Thus, the triple mutant we generated completely has lost the function of all three *Piwi* genes in mice.

Despite this, the triple mutant females were all fertile up to 8 months and generated viable offspring ( $n = 12$ ). This demonstrates that the PIWI-piRNA pathway is dispensable for both viability and fertility in female mice, which is in contrast to the requirement of the pathway in *Drosophila* for viability and female fertility [35]. We therefore bred TKO female mice to triple heterozygous males to generate TKO embryos and live mice. The offspring of these crosses ( $n = 120$ ) displayed normal Mendelian frequencies (TKO expected frequency of 12.5% matched the observed frequency of 15.8%), suggesting that PIWI is not required for embryonic development or postnatal survival (Table 1). In addition, both male and female TKO mice were viable up to 10 months of age ( $n = 19$ ), the longest time that we have tested, and appeared to be indistinguishable from heterozygous littermates, despite the defects in male germline development (data not shown). These results suggest that PIWI proteins are dispensable for normal mouse development and survival.

### PIWI is dispensable for generating iPS Cells

To assess whether PIWI proteins play a role in reprogramming differentiated somatic cells to induced pluripotent stem cells, we performed reprogramming experiments in Oct4-GFP mouse embryonic fibroblasts (MEFs) [36] that were derived from TKO embryos. We transduced the MEFs with retroviruses encoding OCT4, SOX2, KLF4, and c-MYC [7]. We also included the HDAC inhibitor VPA in some of these experiments, as this has been shown to enhance iPSC reprogramming efficiency [37]. We observed colonies approximately one week after virus transduction. Oct4-GFP+ colonies appeared at day 10.

To determine the reprogramming efficiency without bias, we first defined the time point when the number of manually counted GFP+ colonies correlates with the percentage GFP+ cells as determined by fluorescence-activated cell sorting (FACS) analysis. We found that at day 12 post retroviral infection, the number of GFP+ colonies correlated well with the FACS quantification of % GFP ( $R^2 = 0.9523$ ) (Figure 2A). Therefore, we tested the reprogramming efficiency at day 12 for all subsequent experiments. Reprogramming efficiencies were determined by FACS for expression of Oct4-GFP and SSEA1 staining, with Oct4-GFP+/

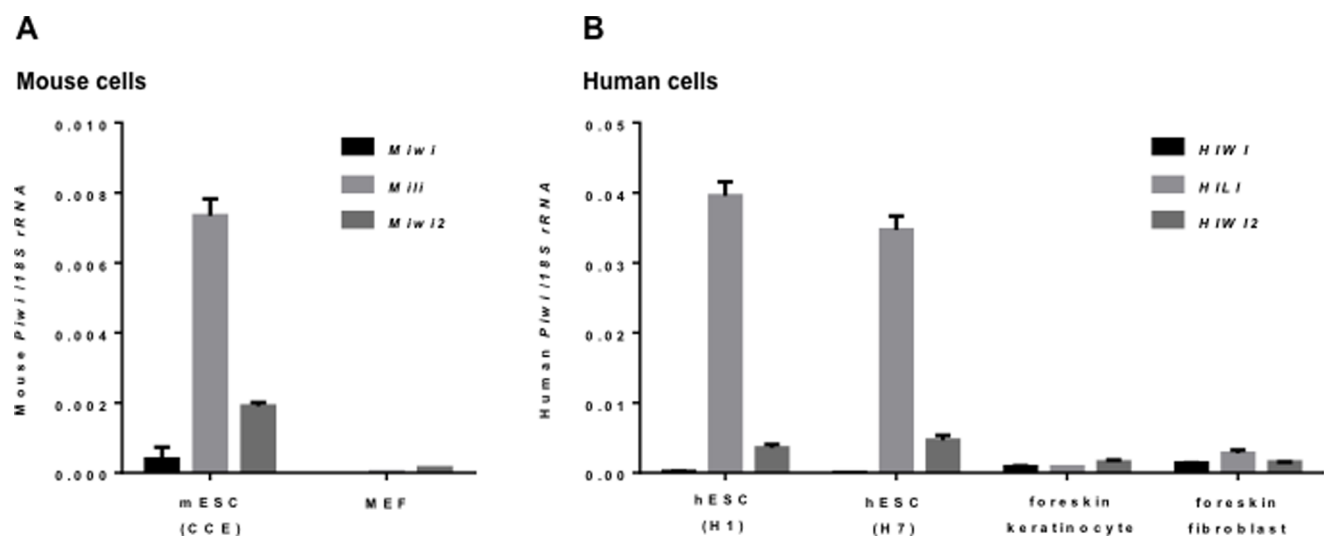

**Figure 1. Expression of *Piwi* transcripts.** qRT-PCR comparison of *piwi* expression in mouse cells (A) and human cells (B). RNA was isolated from mouse ESCs (CCE) and embryonic fibroblasts (MEF) and human ESCs (H1 and H7), human foreskin keratinocytes, human foreskin fibroblasts. The ratios of individual *piwi* genes/eukaryotic 18S rRNA are shown for both panels. doi:10.1371/journal.pone.0097821.g001

**Table 1.** Genotypes of 120 offspring at age 10 months from male triple heterozygous-female triple knockout mating.

| Cross (male X female) | Offspring genotype ( <i>Miwi</i> , <i>Mili</i> , <i>Miwi2</i> ) |               |               |               |               |               |               |               |               |               |
|-----------------------|-----------------------------------------------------------------|---------------|---------------|---------------|---------------|---------------|---------------|---------------|---------------|---------------|
|                       | +/-, +/-, +/-                                                   | -/-, +/-, +/- | +/-, +/-, +/- | +/-, -/-, +/- | -/-, -/-, +/- | +/-, -/-, +/- | -/-, +/-, +/- | +/-, +/-, +/- | -/-, -/-, +/- | -/-, -/-, +/- |
| Triple Het x TKO      | 8                                                               | 13            | 23            | 14            | 13            | 19            | 11            | 19            | 11            | 19            |
| Observed number       | 8                                                               | 13            | 23            | 14            | 13            | 19            | 11            | 19            | 11            | 19            |
| Observed rate (%)     | 6.7                                                             | 10.8          | 19.2          | 11.7          | 10.8          | 15.8          | 9.2           | 15.8          | 9.2           | 15.8          |
| Expected rate (%)     | 12.5                                                            | 12.5          | 12.5          | 12.5          | 12.5          | 12.5          | 12.5          | 12.5          | 12.5          | 12.5          |

doi:10.1371/journal.pone.0097821.t001

SSEA1+ cells being indicative of fully reprogrammed cells. By contrast, Oct4-GFP-/SSEA1+ cells represent an intermediate step of reprogramming [36] (Figure 2B). We found that both fully and intermediately reprogramming efficiencies were not discernible between TKO MEFs and control (Ctrl) MEFs (Figure 2C and 2D). VPA, which is believed to act at the epigenetic level, increased the reprogramming efficiency by ten-fold in both TKO and Ctrl MEFs, indicating that PIWI proteins are not required for VPA enhancement of reprogramming efficiency.

Furthermore, PIWI-deficient iPSCs were expandable, and showed morphology and proliferation similar to control iPSCs (Figure 3A). These cells expressed the pluripotency-associated factors OCT4 and SOX2 at comparable levels to those in control iPSCs (Figure 3B-3D), and could be maintained in an undifferentiated state over 30 passages (Figure 3E). To further test that iPSCs can be maintained without the PIWI protein family, we performed competitive cell growth assays [38]. In these assays, either TKO or Ctrl iPSCs expressing Oct4-GFP were co-cultured with a mouse ES cell line, S1B6A, at a 1-to-1 ratio (counted as passage 0). We monitored over five passages to determine if TKO exhibited any growth advantages or disadvantages. We anticipated that if PIWI proteins did not affect iPSC self-renewal, the growing populations of % GFP+ iPSCs would remain the same as Ctrl cells. Indeed, supporting the results that TKO iPSCs express robust pluripotency markers, the percentage of GFP-positive cells in TKO and Ctrl cells were indiscernible over five passages (Figure 3F).

To assess their developmental potential, PIWI-deficient iPSCs were injected subcutaneously into SCID/Beige mice. The resulting teratomas displayed differentiated cells from all three germ layers (Figure 4). This observation is consistent with the finding that TKO knockout mice are able to develop normally into adulthood. Taken together, all of the above results indicate that reprogramming can occur equally efficiently in the absence of PIWI proteins.

### Global gene expression of iPSCs is largely unaffected by *Piwi* mutations

Next we investigated whether PIWI proteins are involved in regulating the gene expression of iPSCs by RNA-seq analysis of the transcriptomes of PIWI-deficient iPSCs (Figure 5 A-D). After normalization, the average counts of *Miwi*, *Mili*, and *Miwi2* in Ctrl iPSCs are 15, 895, and 594, respectively. This is consistent with our qRT-PCR expression pattern data, with *Mili* being the highest among the *piwi* family members in pluripotent cells. Direct comparison between TKO and Ctrl lines showed 90 differentially expressed genes (false discovery rate (FDR)-adjusted p-value < 0.05 with > 2.5 fold change in expression) (Table 2). Among these, 34 transcripts were up-regulated in TKO iPSCs, whereas 56 transcripts were down-regulated. Note that there was an up-regulation of *Mili* (*Piwil2*) and *Miwi2* (*Piwil4*) transcripts in TKO iPSCs, but these were non-functional truncated transcripts, as described above. However, known pathways that are important to mESC self-renewal, such as LIF-gp130-Stat3, BMP-TGF- $\beta$ -Smad, MAPK-ERK, and WNT were not affected [39-42]. The most well known factors for reprogramming, such as Oct3/4, Sox2, Klf4, Myc, Nanog, LIN28, and Glis1 [43], were also not affected by *Piwi* mutations. For functional annotation, we performed gene ontology (GO) analysis of the differentially regulated genes in TKO iPSCs. Top GO terms for the down-regulated genes were most involved in biosynthetic and metabolic process (Abra, Npas4, Sorbs1, Inhba, Epas1, LOC100048537, Fgf2, Ghrh) (Table S1 in File S1). Top GO terms for the up-regulated genes were most involved in membrane potential or

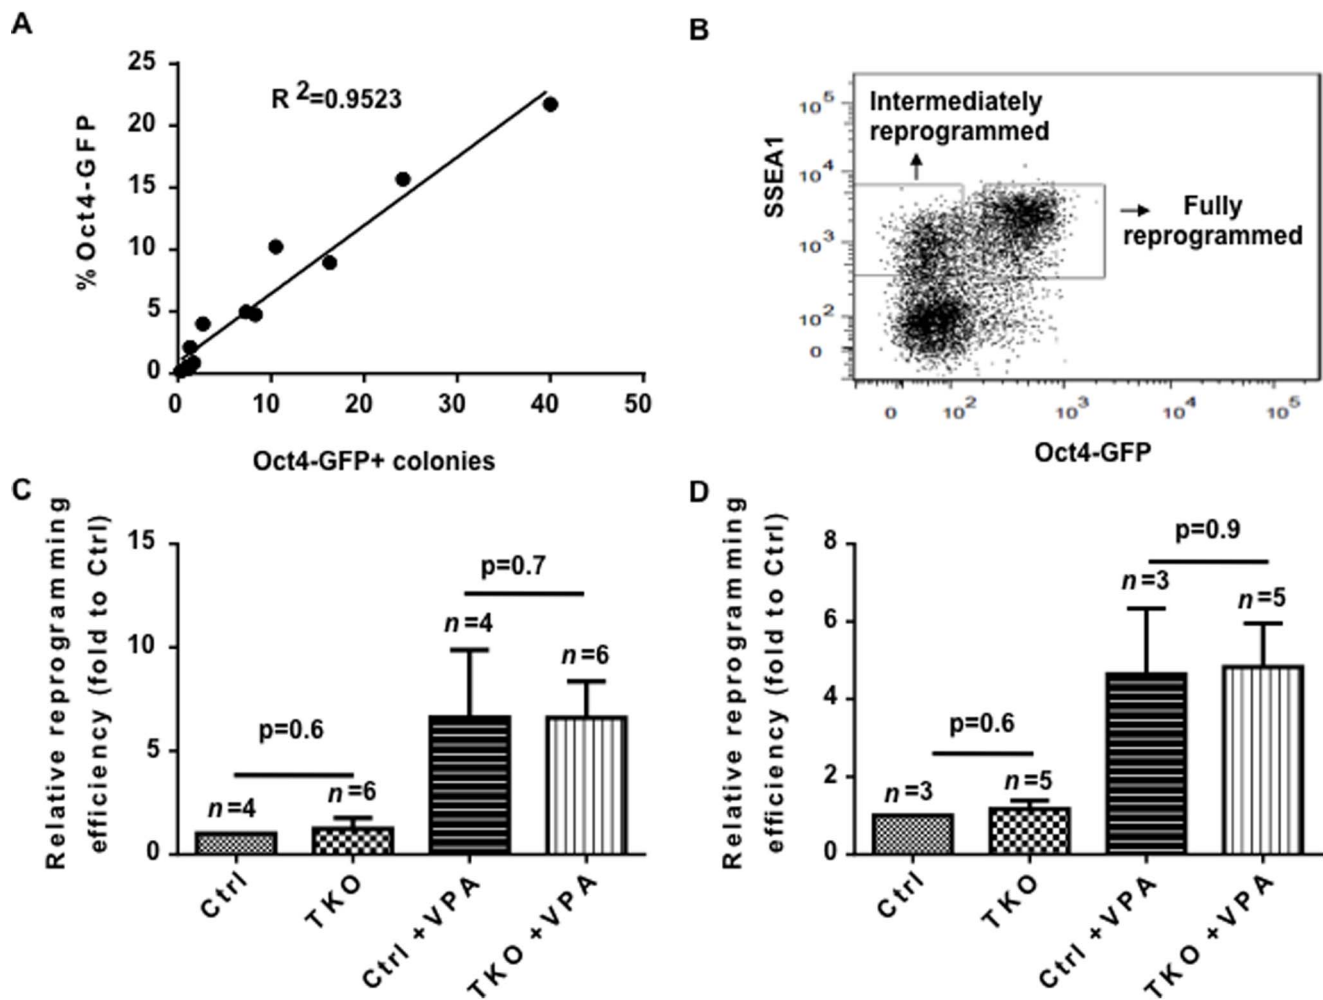

**Figure 2. Reprogramming efficiency in PIWI-deficient MEFs is not compromised.** (A) Correlation between GFP+ colony number and percentage 12 days post transduction. Each dot represents a single well of the reprogramming experiments. (B) Representative FACS plot for SSEA1/Oct4-GFP at 12 days post-viral transduction. (C, D) Relative reprogramming efficiencies are shown, with the fold changes indicated. (C) Fully reprogrammed efficiency, assessed by the percentage of SSEA1+Oct4-GFP+ cells; (D) Intermediately reprogrammed efficiency, assessed by percentage of SSEA1+Oct4-GFP- cells; Student's t-test (two-tailed) is used for statistics. Error bars, standard error. n = experiments with independent MEFs. Ctrl, wild type or heterozygous littermate controls; TKO, triple knockout of piwi. doi:10.1371/journal.pone.0097821.g002

neurogenesis (Olig1, Olig2, Grin1, Bnip3, Sema5a) (Table S2 in File S1). Correlation analysis between the TKO and Ctrl lines showed a strong R-value of 0.99 (Figure 5D). Since there was no detectable effect with a loss of PIWI proteins in these cells, it is likely that such small variations in gene expressions are routinely evident even between different wild-type iPSC lines. Although it is beyond the scope of this manuscript, it will be interesting to examine if TKO mice reveal any metabolic abnormalities or neurogenesis defects. Taken together, our results strongly indicate that PIWI-deficient pluripotent stem cells at this stage are highly similar to Ctrl iPSCs.

## Discussion

In this study, we determined that PIWI protein family is dispensable for mouse somatic development and for reprogramming of fibroblasts into pluripotent stem cells. This is in contrast to the essential role of PIWI proteins for embryogenesis and somatic development in some non-mammalian animals. For example, in planarians and ascidians, PIWI homologs are necessary for the

function of pluripotent stem cells that are capable of giving rise to all three germ layers during whole body regeneration [27]. In *Drosophila*, piwi functions in epigenetic and post-transcriptional gene regulation and in influencing somatic cell functions [44,45]. Furthermore, it mediates canalization, a molecular mechanism that buffers the impact of genotypic and environmental variations on phenotype, to enhance developmental robustness [46–48]. Embryos depleted of maternal PIWI proteins display various severe mitotic defects including abnormal nuclear morphology, cell cycle arrest, and asynchronous nuclear divisions [35]. In mammals, the somatic role of PIWI proteins has not been explored sufficiently. HIWI was described in human bone marrow CD34+ hematopoietic stem cells (HSCs) and progenitors. However, we recently reported that mice lacking all PIWI protein family members were able to maintain long-term hematopoiesis with no observable effect on the homeostatic HSC compartment, suggesting PIWI is dispensable for normal HSC function [49]. The iPSCs lacking all PIWI proteins exhibited pluripotent gene expression and teratoma formation, all of which were indistinguishable from their littermate control cells. Moreover, unlike the

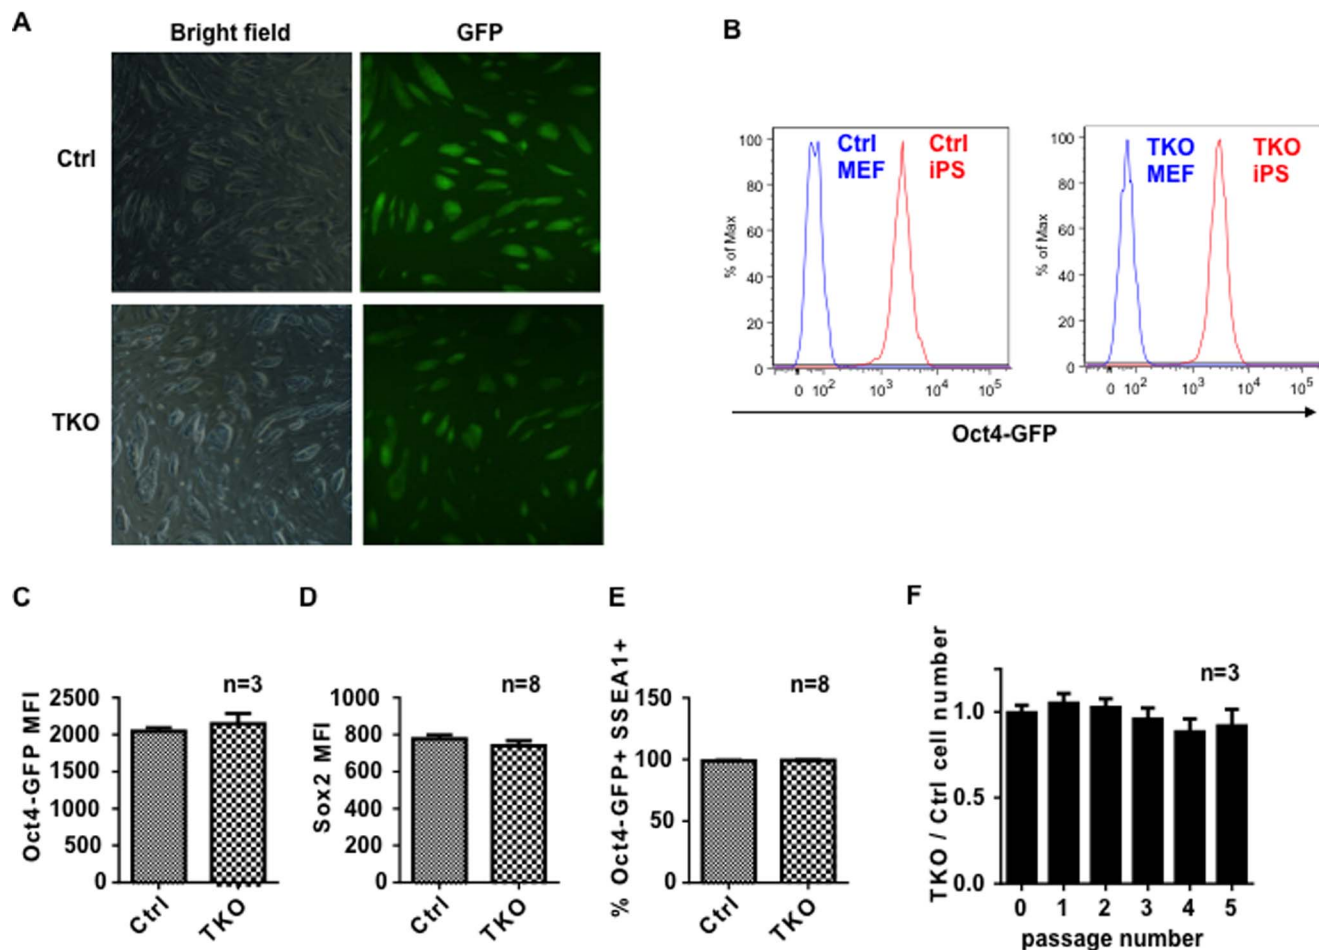

**Figure 3. Piwi-deficiency does not affect reprogramming of MEFs.** (A) iPS colonies exhibited typical ES cell morphology and expressed Oct4-GFP homogeneously. (B) Representative figure showing TKO iPS cells expressed comparable level of Oct4-GFP as Ctrl cells. ( $n=20$ ). Relative expression levels of (C) Oct4-GFP and (D) SOX2 proteins, as denoted by quantitative mean fluorescence intensity (MFI) shown by FACS analysis ( $n=3$  and 8, respectively). (E) Both TKO and Ctrl cells remained pluripotent and express Oct4-GFP<sup>+</sup> SSEA1<sup>+</sup> (>99%) over 30 passages. (F) A competition strategy was designed to determine if Piwi depletion compromises iPSC self-renewal. GFP<sup>+</sup> cells (marked the iPSCs) were mixed in a 1-to-1 ratio with normal mouse ESCs (GFP<sup>-</sup>) cells, and cultured in the presence of LIF. With each passage the ratio of GFP/total cells was measured by FACS. The proportion of GFP<sup>+</sup> cells with TKO were indiscernible from Ctrl cells over five passages ( $n=3$ ). Ctrl, wildtype or heterozygous littermate controls; TKO, triple knockout of piwi.

doi:10.1371/journal.pone.0097821.g003

critical role of *piwi* in the maternal-to-zygotic transition in *Drosophila*, ovaries lacking all PIWI proteins are functional and the female mice are fertile. The resulting ovaries were capable of supporting embryonic development and generated viable pups that survive to adulthood, suggesting that there might be compensatory mechanisms such as endo-siRNA to compensate for the function of the piRNA-PIWI pathway in murine oogenesis. Taken together, our results show that mammalian PIWI functions are restricted to the male germ line. Our study cannot rule out the possibility that the lack of PIWI protein family members could affect the mice as they age. In addition, their ability to cope with tissue damage caused by genetic and environmental stress could be compromised. Likewise, we cannot rule out minor effects of PIWI proteins on the differentiation capacity of reprogrammed iPSCs. These potential roles await further analysis.

## Materials and Methods

### Ethics statement

Animal experiments in this study were carried out in accordance with the Animal Use Protocols as approved by the Institutional Animal Care and Use Committee, Yale University (IACUC Protocol number: 2009-11087).

### Generation of *Miwi*<sup>-/-</sup> *Mili*<sup>-/-</sup> *Miwi2*<sup>-/-</sup> *Oct-GFP* MEFs

To avoid functional redundancy between PIWI family members, we generated cells completely deficient in *Miwi*, *Mili*, and *Miwi2* to make a TKO mutant [29,31,32]. To generate TKO MEFs with the *Oct-GFP* reporter, *Miwi*<sup>-/-</sup> *Mili*<sup>-/-</sup> female mice were crossed to *Oct-GFP* reporter mice [36] (a kind gift from Dr. Valentina Greco, Yale University). The *Miwi*<sup>+/-</sup> *Mili*<sup>+/-</sup> *Oct-GFP*<sup>+/-</sup> were then crossed with *Miwi2*<sup>+/-</sup> mice (a kind gift from Dr. Haig Kazazian, The Johns Hopkins University School of Medicine) to generate *Miwi*<sup>+/-</sup> *Mili*<sup>+/-</sup> *Miwi2*<sup>+/-</sup> *Oct-GFP*<sup>+/-</sup> mice. Male and female triple-heterozygotes with *Oct-GFP*<sup>+/-</sup> were intercrossed to generate female TKO *Oct-GFP* homozygous

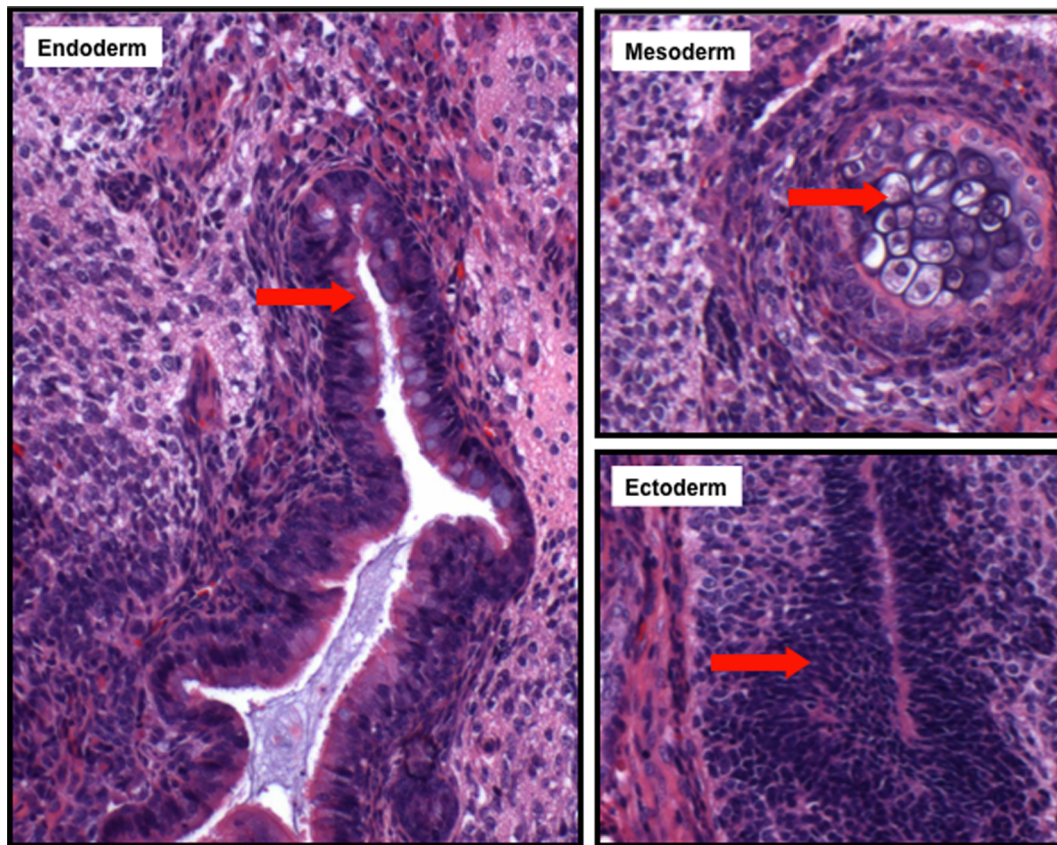

**Figure 4. PIWI-deficient iPSCs form teratomas normally.** Hematoxylin and eosin staining of teratoma sections showed differentiation of TKO iPS cells to tissues derived from all three germ layers, including the gut (endoderm), cartilage (mesoderm), and neural epithelium (ectoderm). doi:10.1371/journal.pone.0097821.g004

mice. To generate Piwi TKO embryos, MEFs were derived from day 12.5–17.5 postcoitum embryos by breeding *Miwi*<sup>+/-</sup> *Mil1*<sup>+/-</sup> *Miwi2*<sup>+/-</sup> *Oct4-GFP* homozygous male mice to *Oct4-GFP* homozygous females, either triple or double knockouts of *Piwi*. Triple-heterozygotes were derived from littermate embryos and served as controls. Gonads, head, and internal organs were removed before processing the embryos for MEF isolation. The embryos used in this study are of mixed C57BL/6-s129 background. All the MEFs were maintained in D-MEM (high glucose) supplemented with 10% fetal bovine serum (Life Technologies), 0.1 mM MEM Non-Essential Amino Acids (Life Technologies), 6 mM L-glutamine (Life Technologies), 1 mM MEM Sodium Pyruvate (Life Technologies), and 1% Pen-Strep (Life Technologies) and were used between 2–3 passages for reprogramming experiments.

#### Retroviral production, infection and iPSC generation

The following plasmids were obtained from Addgene: pMXs-Oct3/4-IP (15918), pMXs-Sox2-IP (15919), pMXs-Klf4-IP (15920) and pMXs-c-Myc-IP (16921). (Addgene). 293FT cells (Life Technologies) were maintained in D-MEM (high glucose) supplemented with 10% fetal bovine serum (Life Technologies), 0.1 mM MEM Non-Essential Amino Acids (Life Technologies), 6 mM L-glutamine (Life Technologies), 1 mM MEM Sodium Pyruvate (Life Technologies), and 1% Pen-Strep. For retrovirus production, the cells were seeded at  $2 \times 10^7$  cells per 175-cm flask a day before transfection. Immediately before transfection, the medium was replaced with 18 ml of D-MEM. A total of 28  $\mu$ g

DNA mixture containing 14  $\mu$ g of plasmid DNA carrying the transgene (Oct4, Sox2, Klf4 or c-Myc) along with 1.4  $\mu$ g of the envelope plasmid pVSV-G (a kind gift of Dr. In-Hyun Park, Yale University) and 12.6  $\mu$ g of the packaging plasmid Gag-Pol (a kind gift of Dr. In-Hyun Park) was first diluted in 175  $\mu$ l of 5% glucose (solution 1). 28  $\mu$ l of 18 mM PEI (Polyethylenimine, Sigma) stock solution was then diluted in 175  $\mu$ l of 5% glucose and placed on a vortex for 1 min (solution 2). After 10 min, both solutions were mixed, and the resulting solution was again placed on the vortex stirrer for 1 min. After 10 more minutes, the transfection mixture was completed up to 1 ml with D-MEM and added to the cells. After 6 h of incubation, the cells were supplemented with 1.8 ml of fetal calf serum. One day after transfection, medium was replaced with fresh complete medium. Retrovirus was harvested 48 h and 72 h post transfection by ultracentrifugation for 1.5 hours at 4 degrees at  $47,810 \times g$  and store at  $-80^\circ\text{C}$ .

We generated iPSC cells as described by the Yamanaka group [50] with the following modifications: One day before transduction, MEFs were seeded at  $4 \times 10^4$  cells per well of a Matrigel coated 12-well plate. On the following day (considered day 0) the concentrated retrovirus were thawed and mixed with fresh MEF media up to 1 ml volume (per well) and 8 ng/ml polybrene, and then exposed to the MEFs at  $37^\circ\text{C}$  and 5%  $\text{CO}_2$ . On day 1 the mixed viral supernatant was removed, the cells were washed twice with PBS and then cultured in fresh MEF medium. On day 2, the MEF medium was replaced with mESC medium containing D-MEM with 15% fetal bovine serum (Gemini Bio-Products), 0.1 mM MEM Non-Essential Amino Acids (Life Technologies),

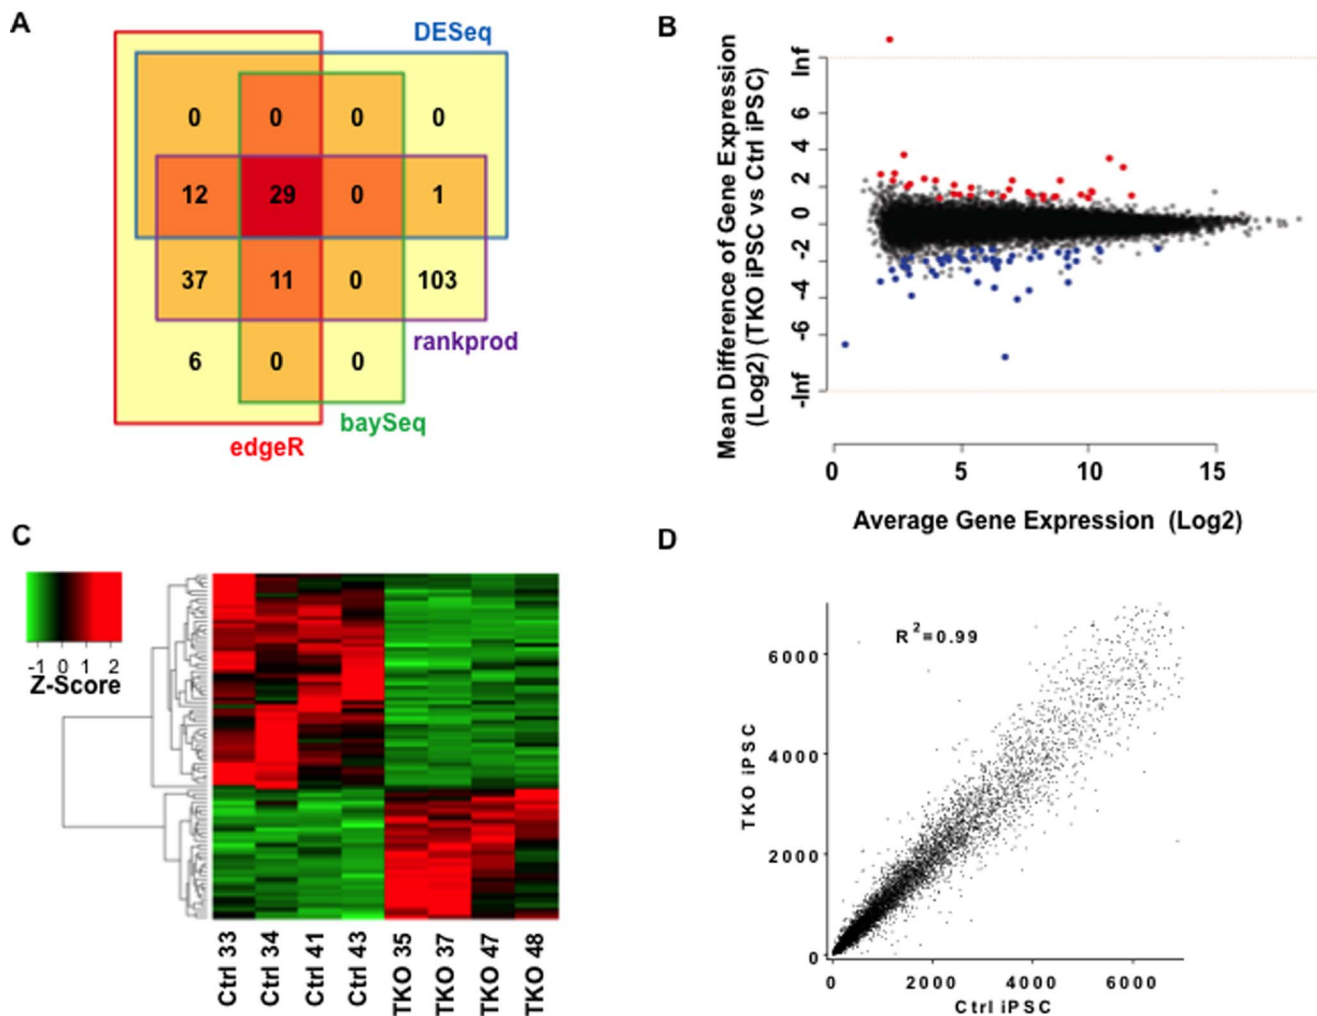

**Figure 5. Differential expressed genes (DEGs) in PIWI-deficient iPSCs.** (A) Venn diagram of the number of DEGs in 4 statistical methods. For the robustness of DEGs detection, we chose 90 DEGs which were identified at least two methods for further downstream analysis. (B) MA plot of all genes tested. X-axis represents average gene expression and Y-axis represents log fold changes. Red or blue dots represent up or down regulated genes, respectively. (C) Heatmap of 90 DEGs clustered by expression patterns. Each gene expression was standardized and the color represents z-score of each expression. Red or green color represent up or down regulation of the genes. (D) Correlation analysis of gene expression level between TKO and Ctrl iPSC ( $n=4$ ). doi:10.1371/journal.pone.0097821.g005

6 mM L-glutamine (Life Technologies) 0.1 mM 2-mercaptoethanol (Sigma), 1% Pen-Strep (Life Technologies) and  $10^3$  Uml<sup>-1</sup> of LIF (Millipore-ESGRO). Thereafter, the medium was changed either every day or every other day, as required. In some experiments, treatment with 1 mM VPA begins on day 3 and lasts for a week [51]. mESC-like colonies started to appear about one week post-transduction. Colonies that were Oct4-GFP+ with mESC-like morphology were manually picked and transferred to 12-well plates pre-plated with mitomycin C-inactivated MEF feeders on day 16. Colonies that continued to expand and maintained their mESC-like morphology were further passaged; those that failed to expand and/or spontaneously differentiated were discarded.

In the iPSC growth competition assays, the S1B6A cell line was a generous gift from Dr. Natalia Ivanova.

#### Flow cytometric analysis

SSEA-1 (eBioscience) and Sox2 (BD Pharmingen) staining was performed according to the manufacturer's instructions. Flow

cytometric analysis was performed with an LSRII flow cytometer (BD Biosciences) and FlowJo software (TreeStar, Ashland, OR). Isotype controls were used in each experiment.

#### Real time RT-PCR

Total RNA was isolated using the High Pure RNA Isolation Kit (Roche Diagnostics, Indianapolis, IN). For all RNA samples, genomic DNA was digested with RNase-free DNase I. cDNA was prepared using Superscript II Reverse Transcriptase (Life Technologies) with random primers (Life Technologies). Gene expression levels were determined using Applied Biosystems TaqMan Gene Expression Assays: *Miwi*: Mm00451649\_m1; *Mili*: Mm01313483\_m1; *Miwi2*: Mm01144775\_m1; *HIWI*: Hs01041737\_m1; *HILI*: Hs00216263\_m1; *HIWI2*: Hs00381509\_m1, and detected by iCycler iQ (Bio-Rad, Hercules, CA). Eukaryotic 18S rRNA: Hs99999901\_s1 was used as an internal control for normalization. The qRT-PCR reactions were performed by absolute quantification method using individual Piwi plasmids as external calibration curve. The Taqman assay

**Table 2.** Differentially expressed genes in triple knockout iPS cells.

| Gen Bank ID  | Symbol        | Mean count in Ctrl | Mean count in TKO | Fold Change |
|--------------|---------------|--------------------|-------------------|-------------|
| NR_028101    |               | 1252.5             | 8.8               | -143        |
| NM_178730    | Tmprss11f     | 13.0               | 0.1               | -91.8       |
| NM_013930    | Aass          | 594.5              | 35.6              | -16.7       |
| NM_008096    | Gc            | 31.5               | 2.1               | -14.7       |
| NR_033602    |               | 699.8              | 58.3              | -12         |
| NR_033599    |               | 257.0              | 24.1              | -10.7       |
| NR_015519    |               | 1752.5             | 195.8             | -8.94       |
| NM_183320    | EG331529      | 147.1              | 16.5              | -8.94       |
| NM_010285    | Ghrh          | 10.4               | 1.2               | -8.56       |
| NM_026108    | Hdhd1a        | 14.8               | 1.9               | -7.75       |
| NM_029422    | Tm7sf4        | 41.9               | 6.1               | -6.87       |
| NM_001145060 | Glyat13       | 19.6               | 3.0               | -6.55       |
| NM_029336    | 1700022P22Rik | 34.3               | 6.0               | -5.75       |
| NM_029911    | Kcnk10        | 11.5               | 2.0               | -5.64       |
| NM_181345    | Npm2          | 89.2               | 16.1              | -5.53       |
| NM_010060    | Dnahc11       | 17.1               | 3.2               | -5.26       |
| NM_011409    | Sifn3         | 189.8              | 37.0              | -5.13       |
| NM_028798    | Crct1         | 16.4               | 3.3               | -4.97       |
| NM_183278    | 2200001115Rik | 1297.8             | 263.5             | -4.92       |
| NM_153553    | Npas4         | 14.4               | 2.9               | -4.92       |
| NM_021311    | Piwil1        | 14.9               | 3.1               | -4.76       |
| NR_036572    |               | 177.0              | 38.0              | -4.66       |
| NM_023785    | Ppbbp         | 39.6               | 9.0               | -4.37       |
| NM_138648    | Olr1          | 152.6              | 37.7              | -4.05       |
| NM_001034964 | Sorbs1        | 24.1               | 6.0               | -4.03       |
| NM_009513    | Nrsn1         | 175.3              | 43.5              | -4.02       |
| NM_008380    | Inhba         | 1460.8             | 363.0             | -4.02       |
| NM_177781    | Trpa1         | 234.0              | 59.6              | -3.93       |
| NM_007560    | Bmpr1b        | 69.1               | 17.6              | -3.91       |
| NM_008006    | Fgf2          | 44.6               | 11.5              | -3.87       |
| NM_177337    | Arl11         | 12.9               | 3.4               | -3.86       |
| NM_011410    | Sifn4         | 119.9              | 31.7              | -3.79       |
| NM_001164466 | Dpys          | 63.5               | 17.2              | -3.7        |
| NM_175456    | Abra          | 33.8               | 9.2               | -3.7        |
| NM_013468    | Ankrd1        | 404.0              | 110.6             | -3.66       |
| NM_008036    | Fosb          | 140.1              | 39.4              | -3.55       |
| NM_001111060 | Cd59a         | 15.2               | 4.3               | -3.54       |
| NM_153127    | Mmrn2         | 1059.0             | 301.8             | -3.51       |
| NM_015759    | Fgd3          | 84.5               | 24.1              | -3.51       |
| NM_001109914 | Apold1        | 38.2               | 11.0              | -3.46       |
| NM_008741    | Nsg2          | 41.5               | 12.0              | -3.45       |
| NM_026262    | 4930524B15Rik | 56.2               | 16.4              | -3.43       |
| NM_008216    | Has2          | 506.8              | 148.4             | -3.41       |
| NM_009606    | Acta1         | 226.8              | 70.4              | -3.22       |
| NM_009922    | Cnn1          | 769.5              | 264.8             | -2.91       |
| NM_177371    | Tnfsf15       | 52.4               | 18.2              | -2.88       |
| NM_010137    | Epas1         | 996.3              | 351.5             | -2.83       |
| NM_011198    | Ptgs2         | 2347.5             | 837.5             | -2.8        |
| NM_008008    | Fgf7          | 392.8              | 141.3             | -2.78       |
| NM_177027    | Zcchc7        | 88.9               | 33.1              | -2.69       |



**Table 2.** Cont.

| Gen Bank ID  | Symbol        | Mean count in Ctrl | Mean count in TKO | Fold Change |
|--------------|---------------|--------------------|-------------------|-------------|
| NM_009378    | Thbd          | 1202.5             | 454.8             | -2.64       |
| NM_177293    | Mtap7d3       | 118.1              | 45.2              | -2.61       |
| NM_001081020 | Adamts6       | 123.4              | 47.4              | -2.6        |
| NM_001081328 | 4833446K15Rik | 70.0               | 27.5              | -2.55       |
| NM_008871    | Serpine1      | 10707.5            | 4247.5            | -2.52       |
| NM_172118    | Myl9          | 2142.5             | 848.0             | -2.52       |
| NM_001085378 | Trpc4ap       | 187.3              | 483.8             | 2.58        |
| NM_054085    | Alpk3         | 630.8              | 1676.3            | 2.65        |
| NM_030127    | Htra3         | 10.7               | 28.9              | 2.69        |
| NM_016968    | Olig1         | 241.8              | 663.3             | 2.74        |
| NM_009154    | Sema5a        | 597.8              | 1667.5            | 2.79        |
| NM_145981    | Phyhip        | 59.7               | 167.5             | 2.81        |
| NM_016967    | Olig2         | 251.5              | 718.0             | 2.85        |
| NM_019626    | Cbln1         | 132.8              | 384.0             | 2.89        |
| NM_028775    | Cyp2s1        | 175.5              | 509.8             | 2.9         |
| NM_028772    | Dmgdh         | 24.1               | 70.0              | 2.9         |
| NM_009760    | Bnip3         | 1907.5             | 5652.5            | 2.96        |
| NM_175290    | Nlrp4f        | 480.0              | 1447.5            | 3.01        |
| NM_139148    | Ctca4         | 17.4               | 52.4              | 3.01        |
| NM_023566    | Muc2          | 14.8               | 45.6              | 3.09        |
| NM_177823    | Ubash3a       | 40.2               | 127.9             | 3.17        |
| NM_008681    | Ndrp1         | 617.8              | 2073.3            | 3.35        |
| NM_207229    | Plac9         | 107.8              | 364.0             | 3.38        |
| NM_177905    | Piwil4        | 594.0              | 2049.0            | 3.45        |
| NM_029525    | Prex2         | 60.9               | 225.8             | 3.71        |
| NM_026922    | Atp2c2        | 20.8               | 82.0              | 3.95        |
| NM_001031621 | Abca17        | 3.6                | 14.9              | 4.13        |
| NM_054049    | Osr2          | 12.5               | 54.1              | 4.31        |
| NM_025325    | Hao           | 3.7                | 16.8              | 4.5         |
| NM_011374    | St8sia1       | 207.3              | 1069.0            | 5.15        |
| NM_007745    | Cort          | 2.2                | 11.2              | 5.15        |
| NM_001098789 | Ndufa4l2      | 55.8               | 288.8             | 5.18        |
| NM_007575    | Ciita         | 6.9                | 36.0              | 5.25        |
| NM_001085541 | RP23-231M4.1  | 5.0                | 27.3              | 5.44        |
| NR_028307    |               | 1.4                | 9.2               | 6.63        |
| NR_002891    |               | 2.0                | 13.4              | 6.68        |
| NM_021308    | Piwil2        | 895.3              | 7682.5            | 8.57        |
| NM_001025388 | Eno1          | 524.8              | 6220.0            | 11.9        |
| NM_008169    | Grin1         | 1.8                | 24.6              | 13.6        |
| NM_172808    | Antxrl        | 0.0                | 4.6               | Inf         |

doi:10.1371/journal.pone.0097821.t002

demonstrated specificity with individual Piwi with no detectable level of the other Piwi homologs.

### Teratoma formation assays

iPSCs were harvested and dissociated into single cells by trypsin. Following resuspension,  $1 \times 10^6$  cells were injected subcutaneously into five to eight-week-old SCID/Beige mice. Three to six weeks post-injection, teratomas were harvested and fixed overnight in 4% Paraformaldehyde, and sent to the Research Histology Facility

at Yale School of Medicine for 5- $\mu$ m paraffin sections and Hematoxylin and Eosin staining.

### Whole-transcriptome RNAseq analysis

Total RNA from individual iPS clones were isolated using the High Pure RNA Isolation Kit (Roche Diagnostics, Indianapolis, IN). For all samples, genomic DNA was digested with RNase-free DNase I. The RNA integrity (RNA Integrity Score  $\geq 8$ ) and quantity was determined on the Agilent 2100 Bioanalyzer (Agilent;

Palo Alto, CA, USA). Library preparation and sequencing were performed by the Yale Stem Cell Genomics Core Facility using the Illumina TruSeq RNA Sample Preparation kit. Samples were sequenced on an Illumina HiSeq 2000 using 50-cycle single-end sequencing. Four biological replicates were generated for the TKO and control, respectively.

Reads were mapped to *Mus musculus* (mm9) reference transcriptome from GenBank using BWA [52] alignment tool. Low-expressed genes that have less than 5 reads mapped in more than half of samples were excluded from further analysis. For sample-wise data normalization, we applied DESeq [53] using R statistical software. To achieve more reliable results, we applied 4 popular parametric or non-parametric methods for detecting differentially expressed genes (DEGs) using RNAseq data: edgeR [54], DESeq [53], baySeq [55], and RankProd [56]. Confident DEGs were identified that satisfy both of the following criteria: 1) in at least 2 methods with a False Discovery Rate (FDR) less than 0.05 (Benjamini-Hochberg method [57]) and 2) with an absolute fold change of 2.5 or greater.

Functional annotation was performed with the Database for Annotation, Visualization, and Integrated Discovery (David; <http://david.abcc.ncifcrf.gov>).

## References

1. Yabuta Y, Kurimoto K, Ohinata Y, Seki Y, Saitou M (2006) Gene expression dynamics during germline specification in mice identified by quantitative single-cell gene expression profiling. *Biol Reprod* 75: 705–716.
2. Matzuk MM (2009) LIN28 lets BLIMP1 take the right course. *Dev Cell* 17: 160–161.
3. Seydoux G, Braun RE (2006) Pathway to totipotency: lessons from germ cells. *Cell* 127: 891–904.
4. Chia NY, Chan YS, Feng B, Lu X, Orlov YL, et al. (2010) A genome-wide RNAi screen reveals determinants of human embryonic stem cell identity. *Nature* 468: 316–320.
5. Haybole N, Tischler J, Hackett JA, Kim S, Tang F, et al. (2013) Prdm14 promotes germline fate and naive pluripotency by repressing FGF signalling and DNA methylation. *EMBO Rep* 14: 629–637.
6. Ma Z, Swigut T, Valouev A, Rada-Iglesias A, Wysocka J (2011) Sequence-specific regulator Prdm14 safeguards mouse ESCs from entering extraembryonic endoderm fates. *Nat Struct Mol Biol* 18: 120–127.
7. Takahashi K, Yamanaka S (2006) Induction of pluripotent stem cells from mouse embryonic and adult fibroblast cultures by defined factors. *Cell* 126: 663–676.
8. Hayashi K, Ohta H, Kurimoto K, Aramaki S, Saitou M (2011) Reconstitution of the mouse germ cell specification pathway in culture by pluripotent stem cells. *Cell* 146: 519–532.
9. Yu J, Vodyanik MA, Smuga-Otto K, Antosiewicz-Bourget J, Frane JL, et al. (2007) Induced pluripotent stem cell lines derived from human somatic cells. *Science* 318: 1917–1920.
10. Anderson RA, Fulton N, Cowan G, Coutts S, Saunders PT (2007) Conserved and divergent patterns of expression of DAZL, VASA and OCT4 in the germ cells of the human fetal ovary and testis. *BMC Dev Biol* 7: 136.
11. Arnold K, Sarkar A, Yram MA, Polo JM, Bronson R, et al. (2011) Sox2(+) adult stem and progenitor cells are important for tissue regeneration and survival of mice. *Cell Stem Cell* 9: 317–329.
12. Gillis AJ, Stoop H, Biermann K, van Gurp RJ, Swartzman E, et al. (2011) Expression and interdependencies of pluripotency factors LIN28, OCT3/4, NANOG and SOX2 in human testicular germ cells and tumours of the testis. *Int J Androl* 34: e160–174.
13. Izadyar F, Pau F, Marh J, Slepko N, Wang T, et al. (2008) Generation of multipotent cell lines from a distinct population of male germ line stem cells. *Reproduction* 135: 771–784.
14. Kuijk EW, de Gier J, Lopes SM, Chambers I, van Pelt AM, et al. (2010) A distinct expression pattern in mammalian testes indicates a conserved role for NANOG in spermatogenesis. *PLoS One* 5: e10987.
15. Liu S, Tang Z, Xiong T, Tang W (2011) Isolation and characterization of human spermatogonial stem cells. *Reprod Biol Endocrinol* 9: 141.
16. Ventela S, Makela JA, Kulmala J, Westermarck J, Toppari J (2012) Identification and regulation of a stage-specific stem cell niche enriched by Nanog-positive spermatogonial stem cells in the mouse testis. *Stem Cells* 30: 1008–1020.
17. Zheng K, Wu X, Kaestner KH, Wang PJ (2009) The pluripotency factor LIN28 marks undifferentiated spermatogonia in mouse. *BMC Dev Biol* 9: 38.
18. Resnick JL, Bixler LS, Cheng L, Donovan PJ (1992) Long-term proliferation of mouse primordial germ cells in culture. *Nature* 359: 550–551.
19. Matsui Y, Zsebo K, Hogan BL (1992) Derivation of pluripotential embryonic stem cells from murine primordial germ cells in culture. *Cell* 70: 841–847.
20. Zwaka TP, Thomson JA (2005) A germ cell origin of embryonic stem cells? *Development* 132: 227–233.
21. Nagamatsu G, Kosaka T, Kawasumi M, Kinoshita T, Takubo K, et al. (2011) A germ cell-specific gene, Prmt5, works in somatic cell reprogramming. *J Biol Chem* 286: 10641–10648.
22. Cox DN, Chao A, Lin H (2000) piwi encodes a nucleoplasmic factor whose activity modulates the number and division rate of germline stem cells. *Development* 127: 503–514.
23. Cox DN, Chao A, Baker J, Chang L, Qiao D, et al. (1998) A novel class of evolutionarily conserved genes defined by piwi are essential for stem cell self-renewal. *Genes Dev* 12: 3715–3727.
24. Harris AN, Macdonald PM (2001) Aubergine encodes a Drosophila polar granule component required for pole cell formation and related to eIF2C. *Development* 128: 2823–2832.
25. Kirino Y, Kim N, de Planell-Saguer M, Khandros E, Chiorean S, et al. (2009) Arginine methylation of Piwi proteins catalysed by dPRMT5 is required for Ago3 and Aub stability. *Nat Cell Biol* 11: 652–658.
26. Megosh HB, Cox DN, Campbell C, Lin H (2006) The role of PIWI and the miRNA machinery in Drosophila germline determination. *Curr Biol* 16: 1884–1894.
27. Juliano C, Wang J, Lin H (2011) Uniting germline and stem cells: the function of Piwi proteins and the piRNA pathway in diverse organisms. *Annu Rev Genet* 45: 447–469.
28. Thomson T, Lin H (2009) The biogenesis and function of PIWI proteins and piRNAs: progress and prospect. *Annu Rev Cell Dev Biol* 25: 355–376.
29. Deng W, Lin H (2002) *miwi*, a murine homolog of *piwi*, encodes a cytoplasmic protein essential for spermatogenesis. *Dev Cell* 2: 819–830.
30. Unhavaithaya Y, Hao Y, Beyret E, Yin H, Kuramochi-Miyagawa S, et al. (2009) MILI, a PIWI-interacting RNA-binding protein, is required for germ line stem cell self-renewal and appears to positively regulate translation. *J Biol Chem* 284: 6507–6519.
31. Kuramochi-Miyagawa S, Kimura T, Ijiri TW, Isobe T, Asada N, et al. (2004) Mili, a mammalian member of piwi family gene, is essential for spermatogenesis. *Development* 131: 839–849.
32. Carmell MA, Girard A, van de Kant HJ, Bourc'his D, Bestor TH, et al. (2007) MIWI2 is essential for spermatogenesis and repression of transposons in the mouse male germline. *Dev Cell* 12: 503–514.
33. Aravin AA, Sachidanandam R, Bourc'his D, Schaefer C, Pezic D, et al. (2008) A piRNA pathway primed by individual transposons is linked to de novo DNA methylation in mice. *Mol Cell* 31: 785–799.
34. Vourekas A, Zheng Q, Alexiou P, Maragkakis M, Kirino Y, et al. (2012) Mili and Miwi target RNA repertoire reveals piRNA biogenesis and function of Miwi in spermiogenesis. *Nat Struct Mol Biol* 19: 773–781.
35. Mani SR, Megosh H, Lin H (2013) PIWI proteins are essential for early Drosophila embryogenesis. *Dev Biol*.
36. Brambrink T, Foreman R, Welstead GG, Lengner CJ, Wernig M, et al. (2008) Sequential expression of pluripotency markers during direct reprogramming of mouse somatic cells. *Cell Stem Cell* 2: 151–159.

## Supporting Information

**File S1** Table S1, Gene ontology analysis of down-regulated genes in triple knockout iPS cells. Table S2, Gene ontology analysis of up-regulated genes in triple knockout iPS cells. (DOCX)

## Acknowledgments

We thank Celina Juliano, Eriona Hysolli and Sharon Lin for helpful comments and careful reading of the manuscript; Mei Zhong at the Yale Stem Cell Center Genomics Core for support in sequencing.

## Author Contributions

Conceived and designed the experiments: EC HL. Performed the experiments: EC. Analyzed the data: EC DK ZW HL. Contributed reagents/materials/analysis tools: EC DK ZW HL. Wrote the paper: EC HL.

37. Huangfu D, Osafune K, Mahr R, Guo W, Eijkelenboom A, et al. (2008) Induction of pluripotent stem cells from primary human fibroblasts with only Oct4 and Sox2. *Nat Biotechnol* 26: 1269–1275.
38. Lee DF, Su J, Sevilla A, Gingold J, Schaniel C, et al. (2012) Combining competition assays with genetic complementation strategies to dissect mouse embryonic stem cell self-renewal and pluripotency. *Nat Protoc* 7: 729–748.
39. Sato N, Meijer L, Skaltsounis L, Greengard P, Brivanlou AH (2004) Maintenance of pluripotency in human and mouse embryonic stem cells through activation of Wnt signaling by a pharmacological GSK-3-specific inhibitor. *Nat Med* 10: 55–63.
40. Burdon T, Stracey C, Chambers I, Nichols J, Smith A (1999) Suppression of SHP-2 and ERK signalling promotes self-renewal of mouse embryonic stem cells. *Dev Biol* 210: 30–43.
41. Ying QL, Nichols J, Chambers I, Smith A (2003) BMP induction of Id proteins suppresses differentiation and sustains embryonic stem cell self-renewal in collaboration with STAT3. *Cell* 115: 281–292.
42. Niwa H, Burdon T, Chambers I, Smith A (1998) Self-renewal of pluripotent embryonic stem cells is mediated via activation of STAT3. *Genes Dev* 12: 2048–2060.
43. Mackawa M, Yamaguchi K, Nakamura T, Shibukawa R, Kodanaka I, et al. (2011) Direct reprogramming of somatic cells is promoted by maternal transcription factor Glis1. *Nature* 474: 225–229.
44. Yin H, Lin H (2007) An epigenetic activation role of Piwi and a Piwi-associated piRNA in *Drosophila melanogaster*. *Nature* 450: 304–308.
45. Brower-Toland B, Findley SD, Jiang L, Liu L, Yin H, et al. (2007) *Drosophila* PIWI associates with chromatin and interacts directly with HP1a. *Genes Dev* 21: 2300–2311.
46. Peng JC, Lin H (2013) Beyond transposons: the epigenetic and somatic functions of the Piwi-piRNA mechanism. *Curr Opin Cell Biol* 25: 190–194.
47. Gangaraju VK, Yin H, Weiner MM, Wang J, Huang XA, et al. (2011) *Drosophila* Piwi functions in Hsp90-mediated suppression of phenotypic variation. *Nat Genet* 43: 153–158.
48. Specchia V, Piacentini L, Tritto P, Fanti L, D'Alessandro R, et al. (2010) Hsp90 prevents phenotypic variation by suppressing the mutagenic activity of transposons. *Nature* 463: 662–665.
49. Nolde MJ, Cheng EC, Guo S, Lin H (2013) Piwi genes are dispensable for normal hematopoiesis in mice. *PLoS One* 8: e71950.
50. Takahashi K, Okita K, Nakagawa M, Yamanaka S (2007) Induction of pluripotent stem cells from fibroblast cultures. *Nat Protoc* 2: 3081–3089.
51. Huangfu D, Mahr R, Guo W, Eijkelenboom A, Snitow M, et al. (2008) Induction of pluripotent stem cells by defined factors is greatly improved by small-molecule compounds. *Nat Biotechnol* 26: 795–797.
52. Li H, Durbin R (2009) Fast and accurate short read alignment with Burrows-Wheeler transform. *Bioinformatics* 25: 1754–1760.
53. Anders S, Huber W (2010) Differential expression analysis for sequence count data. *Genome Biol* 11: R106.
54. Robinson MD, McCarthy DJ, Smyth GK (2010) edgeR: a Bioconductor package for differential expression analysis of digital gene expression data. *Bioinformatics* 26: 139–140.
55. Hardcastle TJ, Kelly KA (2010) baySeq: empirical Bayesian methods for identifying differential expression in sequence count data. *BMC Bioinformatics* 11: 422.
56. Hong F, Breiting R, McEntee CW, Wittner BS, Nemhauser JL, et al. (2006) RankProd: a bioconductor package for detecting differentially expressed genes in meta-analysis. *Bioinformatics* 22: 2825–2827.
57. Benjamini Y, Drai D, Elmer G, Kafkafi N, Golani I (2001) Controlling the false discovery rate in behavior genetics research. *Behav Brain Res* 125: 279–284.
